# Supplementary material
Source: Springer Nature journal article supplement (https://www.springermedizin.de/resource/supplementary/12943_2012_1015_MOESM10_ESM.pdf/9552122)

# Differential gene expression in 6 breast cancer cell lines in response to lapatinib.

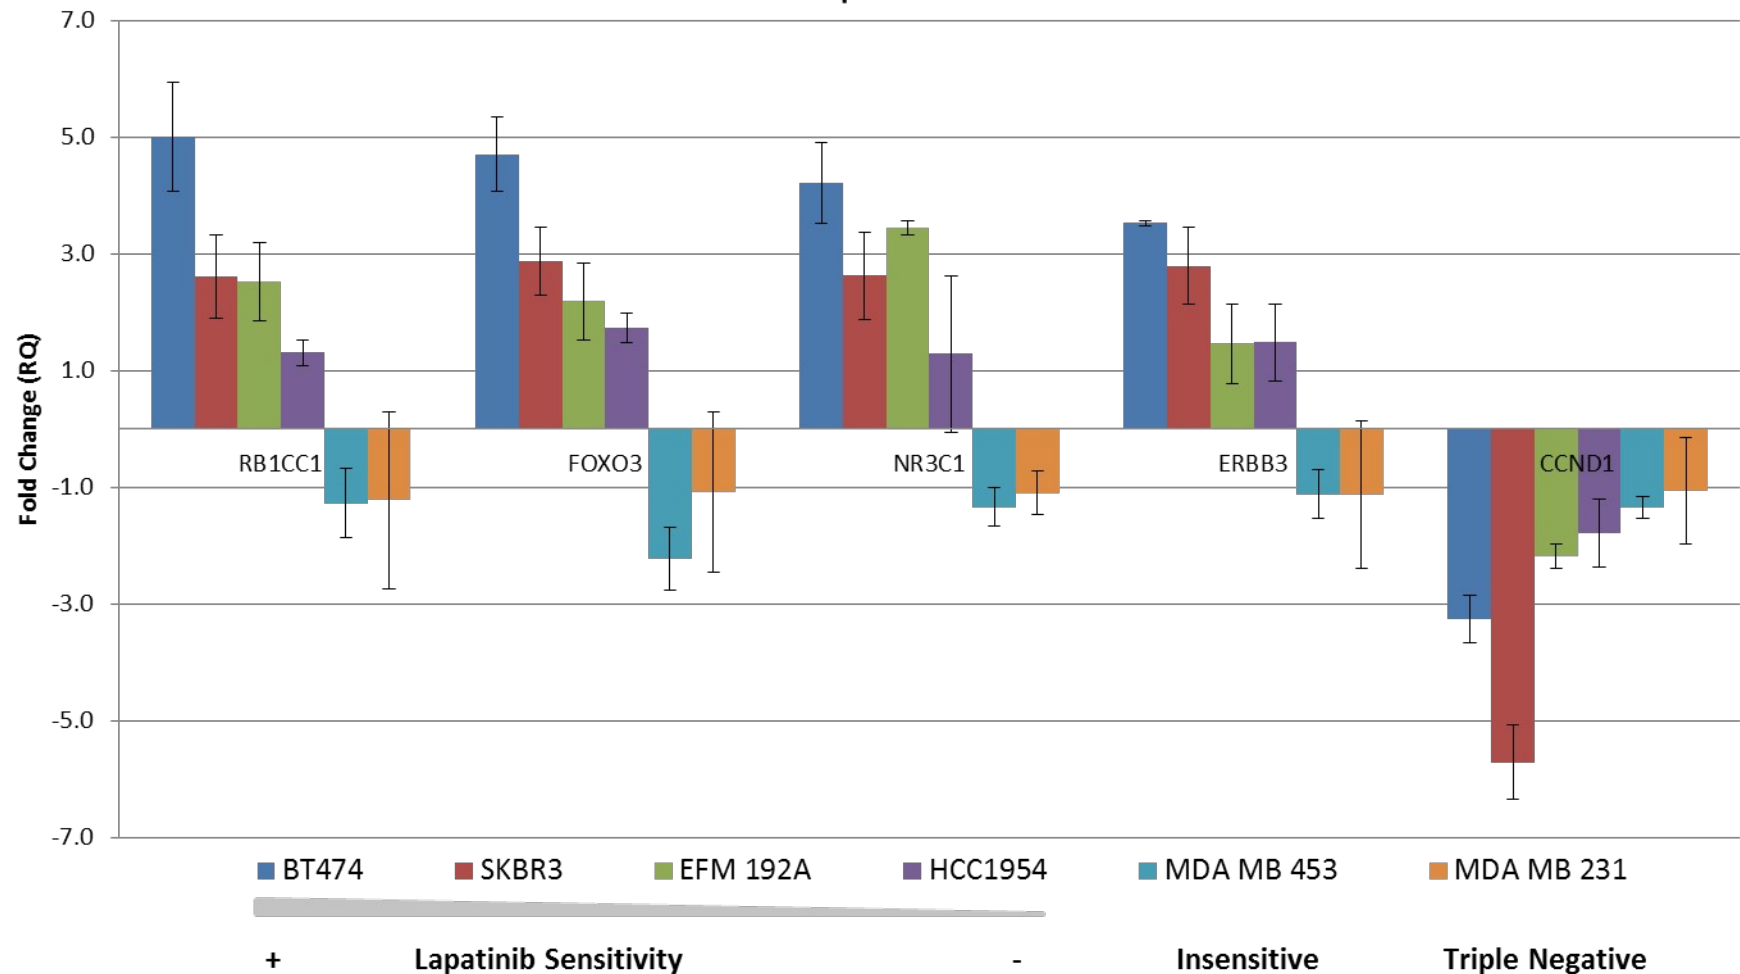

Supplement: MOESM10 [file 9552122]
